1 **Increased posterior default mode network activity and structural**  
2 **connectivity in young adult *APOE*- $\epsilon$ 4 carriers: a multi-modal imaging**  
3 **investigation**

4 Carl J. Hodgetts<sup>1</sup>, Jonathan P. Shine<sup>2</sup>, Huw Williams<sup>1</sup>, Mark Postans<sup>1</sup>,  
5 Rebecca Sims<sup>3</sup>, Julie Williams<sup>3</sup>, Andrew D. Lawrence<sup>1</sup> & Kim S. Graham<sup>1</sup>

6

7 (1) Cardiff University Brain Research Imaging Centre, School of Psychology, Cardiff  
8 University, Maindy Road, Cardiff CF24 4HQ, Wales, UK

9 (2) German Center for Neurodegenerative Diseases (DZNE), Aging and Cognition Research  
10 Group, 39120 Magdeburg, Germany.

11 (3) Division of Psychological Medicine and Clinical Neurosciences, MRC Centre for  
12 Neuropsychiatric Genetics and Genomics, School of Medicine, Cardiff University, Maindy  
13 Road, Cardiff CF24 4HQ, Wales, UK

14

15

16

17

18

19

20

21

22

23

24 **Corresponding author:** Dr Carl J Hodgetts: School of Psychology, Cardiff

25 University, Tower Building, Park Place, CF10 3AT, UK; Tel: 029 2087 0715;

26 Email: [hodgettscj@cardiff.ac.uk](mailto:hodgettscj@cardiff.ac.uk)

27 **Abstract**

28 Young adult *APOE*- $\epsilon$ 4 carriers show increased activity in posterior regions of  
29 the default mode network (pDMN), but how this is related to structural  
30 connectivity is unknown. Thirty young adults (half *APOE*- $\epsilon$ 4 carriers, the other  
31 half *APOE*- $\epsilon$ 3/ $\epsilon$ 2 $\epsilon$ 3; mean age 20 years) were scanned using both diffusion  
32 and functional magnetic resonance imaging. Diffusion tractography was used  
33 to quantify the microstructure (mean diffusivity, MD; fractional anisotropy, FA)  
34 of the parahippocampal cingulum bundle (PHCB), which links pDMN and the  
35 medial temporal lobe. *APOE*- $\epsilon$ 4 carriers had lower MD and higher FA relative  
36 to non-carriers in PHCB. Further, PHCB microstructure was selectively  
37 associated with pDMN activity during a scene discrimination task known to be  
38 sensitive to Alzheimer's disease (AD). These findings are consistent with a  
39 lifespan view of AD risk, where early-life structural and functional brain  
40 changes in specific, vulnerable networks leads to increased neural activity  
41 that may ultimately trigger amyloid- $\beta$  deposition.

42

43 **Key Words**

44 Alzheimer's disease; *APOE*; Default mode network; Diffusion MRI; Functional  
45 MRI; Individual differences; Scene processing; Parahippocampal cingulum  
46 bundle

47

48

49

50

51

## 52 **1. Background**

53 The default mode network (DMN) is a large-scale brain system displaying  
54 continuously high levels of coordinated activity in the resting-state (Raichle,  
55 2015). DMN activity is maintained or enhanced during internally directed  
56 cognition (e.g., autobiographical memory, mind-wandering), and is attenuated  
57 during many cognitive tasks demanding external perceptual attention (e.g.  
58 episodic memory encoding) (Raichle, 2015).

59

60 Rather than constituting a single, unitary brain network, the DMN can be  
61 divided into several functionally dissociable subsystems (Andrews-Hanna et  
62 al., 2010; Raichle, 2015), which are affected differently by Alzheimer's  
63 disease (AD) progression (Myers et al., 2014). Notably, the posterior DMN  
64 (pDMN), comprising posterior cingulate, precuneus and retrosplenial cortex  
65 (Cauda et al., 2010), is one of the earliest brain areas to undergo amyloid- $\beta$   
66 accumulation and reduced metabolism in AD (Gonneaud et al., 2016;  
67 Palmqvist et al., 2017). The pDMN also constitutes the brain's structural  
68 "core" and is characterized both by high levels of baseline activity/metabolism  
69 and dense functional and structural inter-connectivity (Bero et al., 2012;  
70 Buckner et al., 2009; Hagmann et al., 2008).

71

72 The striking spatial overlap between the pDMN and regions that show early  
73 amyloid- $\beta$  accumulation has led to a 'lifespan systems vulnerability' (LSV)  
74 account of AD, where increased activity and connectivity - over the *lifetime* -  
75 may predispose this region to later-life amyloid- $\beta$  (Buckner et al., 2009; de  
76 Haan et al., 2012; Jagust and Mormino, 2012). Providing strong evidence for

77 a link between neural activity/connectivity and amyloid- $\beta$ , a study in  
78 transgenic mice (Bero et al., 2011) reported that interstitial amyloid- $\beta$  levels  
79 were associated with increased markers of neural activity, and this, in turn,  
80 predicted amyloid- $\beta$  deposition, particularly in pDMN ((Bero et al., 2011); see  
81 also (Yamamoto et al., 2015)). A further study showed that region-specific  
82 levels of functional connectivity in young A $\beta$ - mice was proportional to the  
83 degree of amyloid- $\beta$  burden in older animals (Bero et al., 2012). Similarly,  
84 human neuroimaging studies have reported associations, within-subjects,  
85 between the degree of baseline pDMN functional connectivity and subsequent  
86 amyloid- $\beta$  load in both mild cognitive impairment (MCI) (Myers et al., 2014)  
87 and cognitively-normal older adults (Jack and Holtzman, 2013). While these  
88 studies suggest that functional properties may drive pathological markers, it  
89 could reflect a later-life compensatory response induced by early amyloid- $\beta$   
90 burden in key networks (Jagust and Mormino, 2012; Jones et al., 2016).

91  
92 If later-life amyloid- $\beta$  deposition in pDMN is associated with increased  
93 functional activity/connectivity across the lifespan, then alterations may be  
94 evident in younger individuals at elevated risk of AD. Further, as amyloid- $\beta$   
95 deposition is highly unlikely in young adults (de Haan et al., 2012; Mormino,  
96 2014), this approach addresses a key limitation of studies in elderly  
97 individuals where compensatory functional activity may reflect early pathology  
98 (Jagust and Mormino, 2012).

99  
100 The *APOE*- $\epsilon$ 4 allele is the strongest genetic risk factor for both sporadic early  
101 and late-onset AD (Liu et al., 2013) and is strongly linked to amyloid- $\beta$

102 accumulation in later life (Gonneaud et al., 2016). Functional magnetic  
103 resonance imaging (fMRI) studies have typically found that young *APOE-ε4*  
104 carriers show increased activity, relative to non-carriers, in pDMN and inter-  
105 connected medial temporal lobe (MTL) regions (Dennis et al., 2010; Filippini  
106 et al., 2009; Shine et al., 2015). *APOE-ε4* carriers have also been shown to  
107 have greater intrinsic functional connectivity in the DMN during “rest” (Filippini  
108 et al., 2009).

109

110 Given the view that pDMN vulnerability to amyloid-β accumulation is linked to  
111 its role as a large-scale connectivity hub (Jagust and Mormino, 2012; Jones et  
112 al., 2016), the heightened pDMN activity in young *APOE-ε4* carriers may itself  
113 be linked to variation in structural connectivity (Brown et al., 2011; de Haan et  
114 al., 2012) - particularly those connections linking pDMN with other regions  
115 affected early in AD.

116

117 The major white matter connection linking pDMN with MTL (particularly  
118 parahippocampal cortex) (Greicius et al., 2009; Heilbronner and Haber, 2014)  
119 is the parahippocampal cingulum bundle (PHCB). Studies applying diffusion  
120 magnetic resonance imaging (dMRI) – a method allowing *in vivo* quantification  
121 of white matter microstructure – have reported greater mean diffusivity (MD)  
122 and lower fractional anisotropy (FA) in the PHCB of cognitively-normal older  
123 *APOE-ε4* carriers compared to non-carriers (Heise et al., 2014). One cross-  
124 sectional dMRI study found that young adult *APOE-ε4* carriers had higher  
125 PHCB FA but showed a steeper decline across life, leading to relative FA  
126 reduction relative to non-carriers from mid-life onwards ((Felsky, 2013); see

127 also (Brown et al., 2011)). Disruption of this pathway is also seen in both MCI  
128 and AD (Mito et al., 2018; Rieckmann et al., 2016), and has been linked to  
129 pDMN activity/metabolism in AD (Villain et al., 2008) and amyloid- $\beta$  burden in  
130 preclinical AD (Racine et al., 2014). Overall, these studies point toward the  
131 potential early-life vulnerability of a broader posterior network that is  
132 structurally underpinned by the PHCB (Greicius et al., 2009). Further, they  
133 support the view that increased brain activity over the lifespan – driven by  
134 structural connectivity - leads to amyloid- $\beta$  deposition, and ultimately results in  
135 decreased activity/connectivity in later life due to “wear and tear” (Jagust and  
136 Mormino, 2012).

137

138 It is unclear, however, whether these PHCB microstructural alterations are  
139 evident earlier in life when amyloid- $\beta$  deposition is unlikely, concomitant with  
140 the identified functional changes in college-aged adults (Dennis et al., 2010;  
141 Filippini et al., 2009; Shine et al., 2015). Moreover, if increased activity in  
142 pDMN stems from its role as a large-scale connectivity hub (Brown et al.,  
143 2011; de Haan et al., 2012), then those individuals who show elevated pDMN  
144 activity (Filippini et al., 2009; Shine et al., 2015) should also have “increased”  
145 structural connectivity (de Haan et al., 2012). To address these questions we  
146 applied high angular resolution dMRI (HARDI (Tuch et al., 2002)), alongside  
147 constrained spherical deconvolution (CSD) tractography (Jeurissen et al.,  
148 2011), to test whether the presence of an *APOE*- $\epsilon$ 4 allele in young adults,  
149 who are unlikely to harbor amyloid burden, influences PHCB tissue  
150 microstructure. Given evidence that young *APOE*- $\epsilon$ 4 carriers show elevated  
151 pDMN activity at rest and during tasks (Shine et al., 2015), we predicted that

152 *APOE*- $\epsilon$ 4 carriers would show greater FA and lower MD in the PHCB,  
153 compared to non-carriers. Finally, to demonstrate a link between activity and  
154 connectivity, as predicted by an LSV view of AD risk, we examined whether  
155 inter-individual variation in PHCB tissue microstructure was associated with  
156 pDMN activity during a scene discrimination task that is sensitive to early AD  
157 (Lee, 2006).

158

## 159 **2. Material and Methods**

### 160 **2.1. Participants**

161 Full details regarding DNA extraction and genotypic distribution can be found  
162 in a previous article (Shine et al., 2015). The available sample for this analysis  
163 was 30 participants (15 per group; 14 females per group) - a sample size  
164 similar to other structural/functional studies of *APOE*- $\epsilon$ 4 (Dennis et al., 2010;  
165 Filippini et al., 2009; Oh and Jagust, 2013). The non-carrier *APOE* allele  
166 distribution was 10 *APOE*- $\epsilon$ 3 $\epsilon$ 3 and 5 *APOE*- $\epsilon$ 2 $\epsilon$ 3 individuals. The carrier  
167 *APOE* allele distribution was 14 *APOE*- $\epsilon$ 3 $\epsilon$ 4 and 1 *APOE*- $\epsilon$ 2 $\epsilon$ 4. Both groups  
168 were matched for age (carriers: 19.7 years, S.D. = 0.84; non-carriers: 19.7  
169 years, S.D. = 0.89) and education level. Family history was matched across  
170 the groups, with two reports of a positive family history in each. All participants  
171 were right-handed, native English speakers with normal or corrected-to-  
172 normal vision, and had no self-reported history of neurological/psychiatric  
173 disorders. Groups were well matched on standard neuropsychological tests  
174 (Shine et al., 2015). All experimental procedures were conducted in  
175 accordance with, and were approved by, the Cardiff University School of

176 Psychology Research Ethics Committee. Informed consent was obtained from  
177 all participants, and research was conducted in a double-blind manner.

178

## 179 **2.2. MRI scan parameters**

180 Imaging data were collected at the Cardiff University Brain Research Imaging  
181 Centre (CUBRIC) using a GE 3-T HDx MRI system (General Electric  
182 Healthcare, Milwaukee, WI) with an 8-channel receive-only head coil. Whole  
183 brain HARDI (Tuch et al., 2002) data were acquired using a diffusion-  
184 weighted single-shot spin-echo echo-planar imaging (EPI) pulse sequence  
185 with the following parameters: TE = 87ms; voxel dimensions = 2.4 x 2.4 x 2.4  
186 mm<sup>3</sup>; field of view = 23 x 23 cm<sup>2</sup>; 96 x 96 acquisition matrix; 60 slices  
187 (oblique-axial with 2.4 mm thickness). Acquisitions were cardiac gated using a  
188 peripheral pulse oximeter. Gradients were applied along 30 isotropic  
189 directions with  $b = 1200 \text{ s/mm}^2$ . Three non-diffusion weighted images were  
190 acquired with  $b = 0 \text{ s/mm}^2$ .

191

## 192 **2.3. Diffusion MRI preprocessing**

193 Motion and eddy current correction was conducted using ExploreDTI  
194 (Leemans and Jones, 2009). Partial volume corrected maps of tissue FA and  
195 MD were generated by applying the bi-tensor 'Free Water Elimination' (FWE)  
196 procedure (Pasternak et al., 2009). FA reflects the extent to which diffusion is  
197 anisotropic, or constrained along a single axis, and can range from 0 (fully  
198 isotropic) to 1 (fully anisotropic). MD ( $10^{-3} \text{ mm}^2 \text{ s}^{-1}$ ) reflects a combined average  
199 of axial (diffusion along the principal axis) and radial diffusion (diffusion along  
200 the orthogonal direction).



## 201 **2.4. Tractography**

202 Deterministic whole-brain tractography was conducted in ExploreDTI  
203 (Leemans and Jones, 2009) using the CSD model (Jeurissen et al., 2011),  
204 which extracts multiple peaks in the fiber orientation density function (fODF)  
205 (Vettel et al., 2017). Streamlines were reconstructed using the following  
206 parameters: fODF amplitude threshold = 0.1; step size = 0.5 mm; angle  
207 threshold = 60°.

208

209 Three-dimensional reconstructions of the PHCB (Figure 1A) were obtained  
210 from individual subjects using a Boolean, way-point region of interest (ROI)  
211 approach, where “AND” and “NOT” ROIs were applied and combined to  
212 isolate PHCB streamlines in each subject’s whole-brain tractography data.  
213 These ROIs were drawn manually on the direction-encoded FA maps in  
214 native space by one experimenter (HW) who was blind to *APOE-ε4* carrier  
215 status and quality-assessed by a second experimenter (CJH).

216

### 217 *2.4.1. Parahippocampal cingulum reconstruction*

218 Reconstruction of the PHCB followed a previously published and reliable  
219 protocol (termed “restricted parahippocampal cingulum”; see (Jones et al.,  
220 2013)). Following tract reconstruction in both hemispheres, the partial volume  
221 corrected maps for FA and MD were intersected with the PHCB tract masks to  
222 obtain mean bilateral measures of tract microstructure (MD, FA).

223

### 224 *2.4.2. Analysis of tractography data*

225 MD and FA values of the bilateral PHCB in *APOE-ε4* carriers and non-carriers

226 were compared directly using directional Welch t-tests in R. We also report  
227 Default JZS Bayes Factors for our key analyses, computed using JASP  
228 (<https://jasp-stats.org>). The Bayes factor, expressed as  $BF_{10}$ , reflects the  
229 strength of evidence that the data provide for the alternative hypothesis (H1)  
230 relative the null (H0). A  $BF_{10}$  much greater than 1 allows us to conclude that  
231 there is substantial evidence for the alternative versus the null hypothesis  
232 (Wagenmakers et al., 2017).

233

### 234 **2.5 Tract-Based Spatial Statistics (TBSS)**

235 Voxel-wise statistical analysis of the dMRI data was carried out using TBSS  
236 (Smith et al., 2006). This method involves non-linearly projecting subjects'  
237 free water corrected statistical maps (both MD & FA) onto a mean tract  
238 skeleton and then applying voxel-wise cross-subject statistics. We applied a  
239 general linear model (GLM) contrasting *APOE*- $\epsilon$ 4 carriers and non-carriers for  
240 each dMRI metric. To restrict our analysis to the PHCB, we extracted the  
241 PHCB mask from the Johns Hopkins University ICBM-DTI-81 white-matter  
242 atlas using FSLview (e.g., (Heise et al., 2014)). Significant clusters were  
243 extracted using Threshold-Free Cluster Enhancement (Smith and Nichols,  
244 2009) with a corrected alpha of  $p = 0.05$ . Additional exploratory whole brain  
245 analyses were conducted using the same TFCE-corrected statistical  
246 threshold. All reported coordinates are in Montreal Neurological Institute (MNI-  
247 152) space.

248

### 249 **2.6. Functional MRI methods**

250 Further information regarding fMRI acquisition, preprocessing and analysis

251 can be found in Shine et al. (Shine et al., 2015). Five participants were  
252 excluded from the fMRI analysis due to subject motion (4 subjects) and  
253 scanner error (1 subject) resulting in a final sample of 25 participants (13  
254 carriers & 12 non-carriers). The fMRI measure-of-interest was the BOLD  
255 response (percent signal change) in the pDMN during a perceptual ‘odd-one-  
256 out’ discrimination task for scenes and faces (Figure 1A). The pDMN ROI was  
257 defined independently using a different cognitive task (short-term memory);  
258 this analysis confirmed a significant group difference (carriers > non-carriers)  
259 during scene short-term memory in pDMN (Shine et al., 2015). Individual  
260 percent signal change values for scenes and faces (each against a “size”  
261 oddity baseline condition) were calculated from this ROI using FSL and  
262 correlated with diffusion metrics using directional Pearson’s r correlations.  
263 Directional Bayes factors and 95% Bayesian credibility intervals (BCI) are  
264 reported for all correlations. BCIs inform us that, given our observed data,  
265 there is a 95% probability that the true value of our effect (Pearson’s r) lies  
266 within this interval. Correlations between each fMRI task condition and PHCB  
267 microstructure were compared using a one-tailed Steiger Z test of dependent  
268 correlations in ‘cocor’ (<http://comparingcorrelations.org/>) (Diedenhofen and  
269 Musch, 2015).

270

### 271 **3. Results**

#### 272 **3. 1. Comparing PHCB microstructure using tractography**

273 *APOE*- $\epsilon$ 4 allele carriers had significantly lower MD compared to non-carriers (t  
274 (28) = 2.3 p = 0.015, d = 0.84,  $BF_{10}$  = 4.55; Figure 1B). While there was a  
275 strong trend for PHCB FA in the predicted direction, the between-group

276 difference just failed to reach significance ( $t(28) = 1.69$ ,  $p = 0.051$ ,  $d = 0.62$ ,  
277  $BF_{10} = 1.83$ ; Figure 1B).

278

279 Given suggested gender differences associated with *APOE-ε4* (Heise et al.,  
280 2014; Ungar et al., 2014), we also conducted this analysis without male  
281 participants (removal of one individual from each group). A significant  
282 difference was found between carriers and non-carriers for PHCB MD, though  
283 with a slightly larger effect size ( $t(26) = 2.42$ ,  $p = 0.012$ ,  $d = 0.92$ ,  $BF_{10} = 5.5$ ).  
284 A significant difference was also found for PHCB FA ( $t(26) = 2$ ,  $p = 0.03$ ,  $d =$   
285  $0.75$ ,  $BF_{10} = 2.82$ ).

286

### 287 **3.2. Voxel-wise approach**

288 TBSS analyses identified a significant cluster in right posterior PHCB for FA ( $p$   
289  $= 0.02$ ; 29, -49, -1), reflecting higher FA in *APOE-ε4* carriers (Figure 2) -  
290 consistent with the tractography analysis. We found no TFCE-corrected  
291 clusters for MD. Using an uncorrected threshold of  $p = 0.005$  (Postans et al.,  
292 2014), we identified a significant cluster in left posterior PHCB reflecting lower  
293 MD in carriers ( $p < 0.001$ ; -28, -58, 0). An exploratory whole brain analysis  
294 (TFCE-corrected) revealed no significant clusters for either metric.

295

### 296 **3.3. The relationship between pDMN activity and PHCB microstructure**

297 To examine the functional relevance of these structural connectivity metrics,  
298 we tested whether inter-individual variation in PHCB microstructure (MD, FA)  
299 was associated with fMRI response in the pDMN during an 'odd-one-out'  
300 discrimination task for scenes and faces (Shine et al., 2015). Across all

301 subjects, we found a significant negative association between PHCB MD and  
302 scene activity (vs. “size” baseline) in the pDMN ( $r = -0.51$ ,  $p = 0.01$ ,  $BF_{10} =$   
303  $12.1$ , 95% BCI  $[-0.73, -0.13]$ ; Figure 1C). There was no significant association  
304 between MD and face activity ( $r = -0.03$ ,  $p = 0.01$ ,  $BF_{10} = 0.29$ , 95% BCI  $[-$   
305  $0.45, -0.01]$ ). A one-tailed Steiger Z test revealed a significant difference  
306 between these coefficients ( $z = 2.5$ ,  $p < 0.01$ ). For PHCB FA, we likewise  
307 observed a significant association with scene, but not face, pDMN BOLD  
308 response (scene:  $r = 0.49$ ,  $p = 0.01$ ,  $BF_{10} = 8.87$ , 95% BCI  $[0.12, 0.72]$ ); face:  
309  $r = 0.12$ ,  $p = 0.01$ ,  $BF_{10} = 0.41$ , 95% BCI  $[-0.45, -0.01]$ ; Figure 1C). The  
310 correlation between PHCB FA and scene activity was significantly greater  
311 than the correlation with face activity ( $z = 2$ ,  $p = 0.02$ ).

312

#### 313 **4. General discussion**

314 Based on the view that pDMN vulnerability to amyloid- $\beta$  arises from its role as  
315 a large-scale connectivity hub (Bero et al., 2012; Brown et al., 2011; Buckner  
316 et al., 2009; de Haan et al., 2012; Jagust and Mormino, 2012), we asked  
317 whether young adults at heightened genetic risk for AD (via presence of the  
318 *APOE*- $\epsilon 4$  allele) would show increased pDMN structural connectivity (Greicius  
319 et al., 2009). Supporting this hypothesis, we found that *APOE*- $\epsilon 4$  carriers,  
320 relative to non-carriers, had microstructural differences in the PHCB – a white  
321 matter tract linking the pDMN with the MTL, particularly parahippocampal  
322 regions (Heilbronner and Haber, 2014). Moreover, inter-individual variation in  
323 PHCB microstructure was selectively associated with pDMN activity during a  
324 scene discrimination task that is sensitive to early AD (Lee, 2006).

325

326 The pDMN has been labelled the brain's epicenter (Hagmann et al., 2008),  
327 given its disproportionately high structural/functional connectivity (Buckner et  
328 al., 2009; Hagmann et al., 2008). This region is also one of the first brain  
329 areas to undergo amyloid- $\beta$  deposition in AD (Gonneaud et al., 2016;  
330 Palmqvist et al., 2017). The early deposition of amyloid- $\beta$  in pDMN suggests  
331 that the high connectivity/activity demands on this region may, over the  
332 lifespan, lead to amyloid- $\beta$  accumulation and ultimately atrophy and cognitive  
333 decline (Bero et al., 2011). In human neuroimaging studies, strong within-  
334 subject correspondence has been found between pDMN functional  
335 connectivity strength and subsequent amyloid- $\beta$  load in individuals MCI  
336 (Myers et al., 2014). Elevated pDMN connectivity in low-amyloid individuals  
337 (A $\beta$ -) has also been associated with increased amyloid- $\beta$  deposition at follow-  
338 up (Jack et al., 2013). These increases in functional connectivity in older  
339 individuals, however, could reflect a compensatory response induced by early  
340 pathology (Jagust and Mormino, 2012; Jones et al., 2016; Schultz et al.,  
341 2017).

342

343 In young adult *APOE*- $\epsilon$ 4 carriers, who are highly unlikely to harbor amyloid- $\beta$ ,  
344 increased functional activity in pDMN and MTL has been seen across AD-  
345 relevant cognitive tasks (Dennis et al., 2010; Filippini et al., 2009; Shine et al.,  
346 2015). Young *APOE*- $\epsilon$ 4 carriers also display greater intrinsic functional  
347 connectivity in the DMN compared to non-carriers (Filippini et al., 2009) -  
348 consistent with the view that functional activity differences may reflect  
349 increased connectivity. This contrasts with studies in older, cognitively-normal  
350 *APOE*- $\epsilon$ 4 carriers, which report decreased functional connectivity (and also

351 activity) in pDMN regions (Sheline et al., 2010).

352

353 Extending these studies, we found that college-aged *APOE-ε4* carriers had  
354 increased *structural* connectivity (see below) in the PHCB – the main white  
355 matter pathway of the pDMN (Greicius et al., 2009). Specifically, young adult  
356 *APOE-ε4* carriers had lower MD and higher FA compared to non-carriers. The  
357 direction of this effect contrasts with studies in older, cognitively-normal  
358 *APOE-ε4* carriers and MCI, where decreased FA (and increased MD) is  
359 typically seen (Heise et al., 2014; Villain et al., 2008). Further, to demonstrate  
360 that these differences in structural connectivity are linked to difficulties  
361 modulating pDMN activity in *APOE-ε4*, we correlated inter-individual variation  
362 in PHCB microstructure with pDMN BOLD response during a scene  
363 discrimination task that is sensitive to early cognitive changes in AD [37]. This  
364 multi-modal, individual differences approach demonstrated that individuals  
365 with the highest pDMN activity during scene discrimination had the highest  
366 structural connectivity in the PHCB (lower MD/higher FA), suggesting that  
367 individual variation in structural connectivity in the PHCB may impact activity  
368 in pDMN, and subsequent vulnerability to amyloid-β in later life (Jagust and  
369 Mormino, 2012). While group differences in MD and FA most likely reflect an  
370 impact of *APOE-e4* on some aspect(s) of structural connectivity, we cannot  
371 readily determine what these are; variation in these diffusion metrics could  
372 arise from multiple, functionally-relevant biological properties (e.g.,  
373 myelination, membrane permeability and/or axon number, diameter and  
374 voxel-wise configuration (D K Jones et al., 2013)).

375

376 One interpretation of these white matter differences is that they reflect early  
377 neuropathology, such as axonal loss or demyelination. Studies in  
378 asymptomatic adult carriers of a disease-causing *PSEN1* mutation (Ryan et  
379 al., 2013), and also in older adults with a parental history of AD (Melah et al.,  
380 2016), have reported, like here, greater FA (and lower MD) in a wide range of  
381 tracts, including the cingulum. Greater FA has also been observed in  
382 individuals with A $\beta$ + versus A $\beta$ - MCI (Racine et al., 2014). Such differences  
383 have been attributed to axonal loss within specific fiber sub-populations of  
384 complex crossing-fiber areas (Douaud et al., 2011). This would lead to a  
385 reduction in fiber complexity and a concomitant increase in local anisotropy.  
386 Given that these *APOE*- $\epsilon$ 4 carriers will not harbor amyloid- $\beta$  (Mormino, 2014),  
387 however, this neuropathological interpretation seems highly unlikely. Further,  
388 the pattern reported here is opposite to that seen typically in older individuals,  
389 where studies have shown reported lower FA/higher MD in individuals with  
390 AD and MCI ((Mito et al., 2018; Rieckmann et al., 2016) but see (Racine et  
391 al., 2014)). Rather, these findings support a LSV view of AD risk, where early-  
392 life, non-pathologically driven structural and functional alterations in specific  
393 brain networks may confer risk for later-life AD neuropathology (Jagust and  
394 Mormino, 2012).

395

396 Given this, one possible explanation for these white matter differences is that  
397 *APOE*- $\epsilon$ 4 carriers and non-carriers undergo different patterns of white matter  
398 maturation. Previous studies suggest that efficient communication between  
399 distributed brain regions may emerge across development via overgrowth and  
400 then pruning of redundant axons (Yeatman et al., 2012). *APOE*- $\epsilon$ 4 carriers,



401 therefore, may show somewhat delayed axonal pruning of the late-maturing  
402 cingulum (Yeatman et al., 2014) during a critical period, such as adolescence  
403 (Yeatman et al., 2012), which leads to an overshoot in tissue microstructure  
404 and relative increases in pDMN neural activity (Figure 4). This increased  
405 pDMN activity in young adult *APOE*- $\epsilon$ 4 carriers (as seen here during scene  
406 discrimination) may thus reflect some form of lifelong reduced network  
407 efficiency (Jagust and Mormino, 2012) or flexibility (Westlye et al., 2011),  
408 which impacts the ability of the pDMN to modulate activity (or state-dependent  
409 connectivity with MTL (Harrison et al., 2016; Westlye et al., 2011)) required to  
410 accommodate the need of a particular task.

411

412 Critically, these early life increases in pDMN structural connectivity (i.e.,  
413 higher FA/lower MD), and concomitant changes in functional activity (Shine et  
414 al., 2015), may portend a faster decline in connectivity over the lifespan  
415 (Brown et al., 2011; Felsky, 2013), which ultimately leads to early amyloid- $\beta$   
416 deposition and neurodegeneration (de Haan et al., 2012) (depicted in Figure  
417 4). For instance, a cross-sectional study, which applied graph theory to  
418 measure the network characteristics of dMRI data, found that younger *APOE*-  
419  $\epsilon$ 4 carriers had greater 'local interconnectivity' relative to non-carriers but  
420 exhibited a steeper age-related reduction ((Brown et al., 2011); see also  
421 (Felsky, 2013)). A potential compensatory increase in connectivity/activity, in  
422 response to accumulating amyloid- $\beta$  pathology (Schultz et al., 2017), will  
423 result in nodal stress and ultimately network failure (Jones et al., 2016), as  
424 reflected by a second steep decline in network integrity (activity/connectivity;  
425 Figure 3). A recent study, for instance, found that amyloid- $\beta$  contributes to the

426 spreading of tau pathology via the PHCB (Jacobs et al., 2018). Future multi-  
427 modal imaging studies, conducted longitudinally across the lifespan, would  
428 provide further insights into how *APOE-ε4* influences white matter  
429 microstructure and task-related activity across the lifespan.

430

431 While comparable to previous studies (Dennis et al., 2010; Filippini et al.,  
432 2009; Oh and Jagust, 2013), the sample size in the current study is relatively  
433 modest. This issue is partly mitigated by a clear hypothesis-driven approach  
434 (Button et al., 2013) and Bayesian analyses showing that our findings have  
435 high evidential value (Dienes, 2014).

436

437 While we observed significant differences for both FA and MD, our reported  
438 effects were somewhat stronger for MD, particularly for the tractography  
439 analysis. This is consistent with reports that FA shows greater intra-tract  
440 variability than MD – i.e. tracts do not have a signature FA value that is  
441 consistent along the tract length (Yeatman et al., 2012). Future dMRI studies  
442 using advanced tract profiling and biophysical modelling would shed further  
443 insight into the relation between *APOE-ε4* and PHCB microstructure (Assaf et  
444 al., 2017; Yeatman et al., 2012).

445

## 446 **Conclusion**

447 To conclude, we have shown that *APOE-ε4*-related increases in pDMN  
448 activity (Shine et al., 2015) are linked to structural connectivity in the PHCB -  
449 the main white matter conduit linking pDMN with the MTL (Heilbronner and  
450 Haber, 2014). Specifically, *APOE-ε4* carriers had significantly lower MD, and

451 higher FA, in this pathway – the opposite effect to that seen in cognitively-  
452 normal older *APOE*- $\epsilon$ 4 carriers (Felsky, 2013). By combining dMRI and BOLD  
453 fMRI measures, we showed that inter-individual variation in PHCB  
454 microstructure (increased FA/decreased MD) was linked to increased pDMN  
455 activity during a scene discrimination task that is affected in AD (Lee, 2006).  
456 These findings support a LSV model of AD risk, whereby connectivity-  
457 associated increases in pDMN activity across the lifespan may confer risk for  
458 amyloid- $\beta$  accumulation in later life – one of the earliest biomarkers of AD  
459 pathology.

460

461

462

463

464

465

466

467

468

469

470

471

472

473

474

475

476 **Author contributions**

477 CJH, ADL and KSG designed research; CJH collected the data; CJH, JPS,  
478 HW and MP analyzed the neuroimaging data; RS and JW analyzed the  
479 genetic data; CJH wrote the paper with support from all other authors; CJH  
480 and JPS are joint first authors.

481

482 **Acknowledgments**

483 This work was supported by Alzheimer's Research UK (KSG), the Medical  
484 Research Council (MR/N01233X/1: KSG; G1002149: KSG, CJH), a Wellcome  
485 Trust Strategic Award (104943/Z/14/Z; CJH), The Waterloo Foundation, the  
486 Biotechnology and Biological Sciences Research Council (BB/I007091/1;  
487 KSG, MP), and the Welsh Government (via the Wales Institute of Cognitive  
488 Neuroscience). We would like to thank John Evans, Martin Stuart and Peter  
489 Hobden for scanning support.

490

491

492

493

494

495

496

497

498

499

500

501 **References**

- 502 Andrews-Hanna, J.R., Reidler, J.S., Sepulcre, J., Poulin, R., Buckner, R.L.,  
503 2010. Functional-anatomic fractionation of the brain's default network.  
504 *Neuron* 65, 550–562. doi:10.1016/j.neuron.2010.02.005
- 505 Assaf, Y., Johansen-Berg, H., Thiebaut de Schotten, M., 2017. The role of  
506 diffusion MRI in neuroscience. *bioRxiv*.
- 507 Bero, A.W., Bauer, A.Q., Stewart, F.R., White, B.R., Cirrito, J.R., Raichle,  
508 M.E., Culver, J.P., Holtzman, D.M., 2012. Bidirectional relationship  
509 between functional connectivity and amyloid-B deposition in mouse brain.  
510 *J. Neurosci.* 32, 4334–4340. doi:10.1523/JNEUROSCI.5845-11.2012
- 511 Bero, A.W., Yan, P., Roh, J.H., Cirrito, J.R., Stewart, F.R., Raichle, M.E., Lee,  
512 J.-M., Holtzman, D.M., 2011. Neuronal activity regulates the regional  
513 vulnerability to amyloid- $\beta$  deposition. *Nat. Neurosci.* 14, 750–756.  
514 doi:10.1038/nn.2801
- 515 Brown, J.A., Terashima, K.H., Burggren, A.C., Ercoli, L.M., Miller, K.J., Small,  
516 G.W., Bookheimer, S.Y., 2011. Brain network local interconnectivity loss  
517 in aging APOE-4 allele carriers. *Proc. Natl. Acad. Sci.* 108, 20760–20765.  
518 doi:10.1073/pnas.1109038108
- 519 Buckner, R.L., Sepulcre, J., Talukdar, T., Krienen, F.M., Liu, H., Hedden, T.,  
520 Andrews-Hanna, J.R., Sperling, R.A., Johnson, K.A., 2009. Cortical hubs  
521 revealed by intrinsic functional connectivity: mapping, assessment of  
522 stability, and relation to Alzheimer's disease. *J. Neurosci.* 29, 1860–1873.  
523 doi:10.1523/JNEUROSCI.5062-08.2009
- 524 Button, K.S., Ioannidis, J.P.A., Mokrysz, C., Nosek, B.A., Flint, J., Robinson,  
525 E.S.J., Munafò, M.R., 2013. Power failure: why small sample size

- 526 undermines the reliability of neuroscience. *Nat. Rev. Neurosci.* 14, 365–  
527 376. doi:10.1038/nrn3475
- 528 Cauda, F., Geminiani, G., D'Agata, F., Sacco, K., Duca, S., Bagshaw, A.P.,  
529 Cavanna, A.E., 2010. Functional connectivity of the posteromedial cortex.  
530 *PLoS One* 5, 1–11. doi:10.1371/journal.pone.0013107
- 531 de Haan, W., Mott, K., van Straaten, E.C.W., Scheltens, P., Stam, C.J., 2012.  
532 Activity dependent degeneration explains hub vulnerability in Alzheimer's  
533 disease. *PLoS Comput. Biol.* 8, e1002582.  
534 doi:10.1371/journal.pcbi.1002582
- 535 Dennis, N.A., Browndyke, J.N., Stokes, J., Need, A., Burke, J.R., Welsh-  
536 Bohmer, K.A., Cabeza, R., 2010. Temporal lobe functional activity and  
537 connectivity in young adult APOE  $\epsilon$ 4 carriers. *Alzheimer's Dement.* 6,  
538 303–311. doi:10.1016/j.jalz.2009.07.003
- 539 Diedenhofen, B., Musch, J., 2015. Cocor: A comprehensive solution for the  
540 statistical comparison of correlations. *PLoS One* 10, 1–12.  
541 doi:10.1371/journal.pone.0121945
- 542 Dienes, Z., 2014. Using Bayes to get the most out of non-significant results.  
543 *Front. Psychol.* 5, 1–17. doi:10.3389/fpsyg.2014.00781
- 544 Douaud, G., Jbabdi, S., Behrens, T.E.J., Menke, R.A., Gass, A., Monsch,  
545 A.U., Rao, A., Whitcher, B., Kindlmann, G., Matthews, P.M., Smith, S.,  
546 2011. DTI measures in crossing-fibre areas: Increased diffusion  
547 anisotropy reveals early white matter alteration in MCI and mild  
548 Alzheimer's disease. *Neuroimage* 55, 880–890.  
549 doi:10.1016/j.neuroimage.2010.12.008
- 550 Felsky, D., 2013. APOE epsilon4, aging, and effects on white matter across

551 the adult life span. *JAMA Psychiatry*.  
552 doi:10.1001/jamapsychiatry.2013.865

553 Filippini, N., MacIntosh, B.J., Hough, M.G., Goodwin, G.M., Frisoni, G.B.,  
554 Smith, S.M., Matthews, P.M., Beckmann, C.F., Mackay, C.E., 2009.  
555 Distinct patterns of brain activity in young carriers of the APOE- 4 allele.  
556 *Proc. Natl. Acad. Sci.* 106, 7209–7214. doi:10.1073/pnas.0811879106

557 Gonneaud, J., Arenaza-Urquijo, E.M., Fouquet, M., Perrotin, A., Fradin, S., De  
558 La Sayette, V., Eustache, F., Chételat, G., 2016. Relative effect of APOE  
559  $\epsilon$ 4 on neuroimaging biomarker changes across the lifespan. *Neurology*  
560 87, 1696–1703. doi:10.1212/WNL.0000000000003234

561 Greicius, M.D., Supekar, K., Menon, V., Dougherty, R.F., 2009. Resting-state  
562 functional connectivity reflects structural connectivity in the default mode  
563 network. *Cereb. Cortex* 19, 72–78. doi:10.1093/cercor/bhn059

564 Hagmann, P., Cammoun, L., Gigandet, X., Meuli, R., Honey, C.J., Van  
565 Wedeen, J., Sporns, O., 2008. Mapping the structural core of human  
566 cerebral cortex. *PLoS Biol.* 6, 1479–1493.  
567 doi:10.1371/journal.pbio.0060159

568 Harrison, T.M., Burggren, A.C., Small, G.W., Bookheimer, S.Y., 2016. Altered  
569 memory-related functional connectivity of the anterior and posterior  
570 hippocampus in older adults at increased genetic risk for Alzheimer's  
571 disease. *Hum. Brain Mapp.* 37, 366–380. doi:10.1002/hbm.23036

572 Heilbronner, S.R., Haber, S.N., 2014. Frontal Cortical and Subcortical  
573 Projections Provide a Basis for Segmenting the Cingulum Bundle:  
574 Implications for Neuroimaging and Psychiatric Disorders. *J. Neurosci.* 34,  
575 10041–10054. doi:10.1523/JNEUROSCI.5459-13.2014

- 576 Heise, V., Filippini, N., Trachtenberg, A.J., Suri, S., Ebmeier, K.P., Mackay,  
577 C.E., 2014. Apolipoprotein E genotype, gender and age modulate  
578 connectivity of the hippocampus in healthy adults. *Neuroimage* 98, 23–  
579 30. doi:10.1016/j.neuroimage.2014.04.081
- 580 Jack, C.R., Holtzman, D.M., 2013. Biomarker modeling of Alzheimer's  
581 disease. *Neuron* 80, 1347–1358. doi:10.1016/j.neuron.2013.12.003
- 582 Jack, C.R., Wiste, H.J., Weigand, S.D., Knopman, D.S., Lowe, V., Prashanthi,  
583 V., Mielke, M.M., Jones, D.T., Senjem, M.L., Gunter, J.L., Gregg, B.E.,  
584 Pankratz, V.S., Petersen, R.C., 2013. Amyloid-first and  
585 neurodegeneration-first profiles characterize incident amyloid PET  
586 positivity. *Neurology* 81, 1732–1740.
- 587 Jacobs, H.I.L., Hedden, T., Schultz, A.P., Sepulcre, J., Perea, R.D., Amariglio,  
588 R.E., Papp, K. V., Rentz, D.M., Sperling, R.A., Johnson, K.A., 2018.  
589 Structural tract alterations predict down-stream tau accumulation in  
590 amyloid positive older individuals. *Nat. Neurosci.* doi:10.1038/s41593-  
591 018-0070-z
- 592 Jagust, W.J., Mormino, E.C., 2012. Lifespan brain activity, B-amyloid and  
593 Alzheimer Disease. *Trends cogn sci* 15, 520–526.  
594 doi:10.1016/j.tics.2011.09.004.Lifespan
- 595 Jeurissen, B., Leemans, A., Jones, D.K., Tournier, J.D., Sijbers, J., 2011.  
596 Probabilistic fiber tracking using the residual bootstrap with constrained  
597 spherical deconvolution. *Hum. Brain Mapp.* 32, 461–479.  
598 doi:10.1002/hbm.21032
- 599 Jones, D.K., Christiansen, K.F., Chapman, R.J., Aggleton, J.P., 2013. Distinct  
600 subdivisions of the cingulum bundle revealed by diffusion MRI fibre



- 601 tracking: Implications for neuropsychological investigations.  
602 *Neuropsychologia* 51, 67–78.  
603 doi:10.1016/j.neuropsychologia.2012.11.018
- 604 Jones, D.K., Knösche, T.R., Turner, R., 2013. White matter integrity, fiber  
605 count, and other fallacies: The do's and don'ts of diffusion MRI.  
606 *Neuroimage* 73, 239–254. doi:10.1016/j.neuroimage.2012.06.081
- 607 Jones, D.T., Knopman, D.S., Gunter, J.L., Graff-Radford, J., Vemuri, P.,  
608 Boeve, B.F., Petersen, R.C., Weiner, M.W., Jack, C.R., 2016. Cascading  
609 network failure across the Alzheimer's disease spectrum. *Brain* 139, 547–  
610 562. doi:10.1093/brain/awv338
- 611 Lee, A.C.H., 2006. Differentiating the Roles of the Hippocampus and  
612 Perirhinal Cortex in Processes beyond Long-Term Declarative Memory: A  
613 Double Dissociation in Dementia. *J. Neurosci.* 26, 5198–5203.  
614 doi:10.1523/JNEUROSCI.3157-05.2006
- 615 Leemans, A., Jones, D.K., 2009. The B-matrix must be rotated when  
616 correcting for subject motion in DTI data. *Magn. Reson. Med.* 61, 1336–  
617 1349. doi:10.1002/mrm.21890
- 618 Liu, C.C., Kanekiyo, T., Xu, H., Bu, G., 2013. Apolipoprotein e and Alzheimer  
619 disease: Risk, mechanisms and therapy. *Nat. Rev. Neurol.* 9, 106–118.  
620 doi:10.1038/nrneurol.2012.263
- 621 Melah, K.E., Lu, S.Y.-F., Hoscheidt, S.M., Alexander, A.L., Adluru, N.,  
622 Destiche, D.J., Carlsson, C.M., Zetterberg, H., Blennow, K., Okonkwo,  
623 O.C., Gleason, C.E., Dowling, N.M., Bratzke, L.C., Rowley, H.A., Sager,  
624 M.A., Asthana, S., Johnson, S.C., Bendlin, B.B., 2016. Cerebrospinal  
625 Fluid Markers of Alzheimer's Disease Pathology and Microglial Activation

626 are Associated with Altered White Matter Microstructure in Asymptomatic  
627 Adults at Risk for Alzheimer's Disease. *J. Alzheimer's Dis.* 50, 873–886.  
628 doi:10.3233/JAD-150897

629 Mito, R., Raffelt, D., Dhollander, T., Vaughan, D.N., Tournier, J.-D., Salvado,  
630 O., Brodtmann, A., Rowe, C.C., Villemagne, V.L., Connelly, A., 2018.  
631 Fibre-specific white matter reductions in Alzheimer's disease and mild  
632 cognitive impairment. *Brain* 1–15. doi:10.1093/brain/awx355

633 Mormino, E.C., 2014. The Relevance of Beta-Amyloid on Markers of  
634 Alzheimer's Disease in Clinically Normal Individuals and Factors That  
635 Influence These Associations. *Neuropsychol. Rev.* 24, 300–312.  
636 doi:10.1007/s11065-014-9267-4

637 Myers, N., Pasquini, L., Göttler, J., Grimmer, T., Koch, K., Ortner, M., Neitzel,  
638 J., Mühlau, M., Förster, S., Kurz, A., Förstl, H., Zimmer, C.,  
639 Wohlschläger, A.M., Riedl, V., Drzezga, A., Sorg, C., 2014. Within-patient  
640 correspondence of amyloid- $\beta$  and intrinsic network connectivity in  
641 Alzheimer's disease. *Brain* 137, 2052–2064. doi:10.1093/brain/awu103

642 Oh, H., Jagust, W.J., 2013. Frontotemporal Network Connectivity during  
643 Memory Encoding Is Increased with Aging and Disrupted by Beta-  
644 Amyloid. *J. Neurosci.* 33, 18425–18437. doi:10.1523/JNEUROSCI.2775-  
645 13.2013

646 Palmqvist, S., Schöll, M., Strandberg, O., Mattsson, N., Stomrud, E.,  
647 Zetterberg, H., Blennow, K., Landau, S., Jagust, W., Hansson, O., 2017.  
648 Earliest accumulation of  $\beta$ -amyloid occurs within the default-mode  
649 network and concurrently affects brain connectivity. *Nat. Commun.* 8.  
650 doi:10.1038/s41467-017-01150-x

- 651 Pasternak, O., Sochen, N., Gur, Y., Intrator, N., Assaf, Y., 2009. Free water  
652 elimination and mapping from diffusion MRI. *Magn. Reson. Med.* 62,  
653 717–730. doi:10.1002/mrm.22055
- 654 Postans, M., Hodgetts, C.J., Mundy, M.E., Jones, D.K., Lawrence, A.D.,  
655 Graham, K.S., 2014. Interindividual variation in fornix microstructure and  
656 macrostructure is related to visual discrimination accuracy for scenes but  
657 not faces. *J. Neurosci.* 34, 12121–12126.  
658 doi:10.1523/JNEUROSCI.0026-14.2014
- 659 Racine, A.M., Adluru, N., Alexander, A.L., Christian, B.T., Okonkwo, O.C., Oh,  
660 J., Cleary, C.A., Birdsill, A., Hillmer, A.T., Murali, D., Barnhart, T.E.,  
661 Gallagher, C.L., Carlsson, C.M., Rowley, H.A., Dowling, N.M., Asthana,  
662 S., Sager, M.A., Bendlin, B.B., Johnson, S.C., 2014. Associations  
663 between white matter microstructure and amyloid burden in preclinical  
664 Alzheimer’s disease: A multimodal imaging investigation. *NeuroImage*  
665 *Clin.* 4, 604–614. doi:10.1016/j.nicl.2014.02.001
- 666 Raichle, M.E., 2015. The brain’s default mode network. *Annu. Rev. Neurosci.*  
667 38, 433–447. doi:10.1146/annurev-neuro-071013-014030
- 668 Rieckmann, A., Van Dijk, K.R.A., Sperling, R.A., Johnson, K.A., Buckner,  
669 R.L., Hedden, T., 2016. Accelerated decline in white matter integrity in  
670 clinically normal individuals at risk for Alzheimer’s disease. *Neurobiol.*  
671 *Aging* 42, 177–188. doi:10.1016/j.neurobiolaging.2016.03.016
- 672 Ryan, N.S., Keihaninejad, S., Shakespeare, T.J., Lehmann, M., Crutch, S.J.,  
673 Malone, I.B., Thornton, J.S., Mancini, L., Hyare, H., Yousry, T., Ridgway,  
674 G.R., Zhang, H., Modat, M., Alexander, D.C., Rossor, M.N., Ourselin, S.,  
675 Fox, N.C., 2013. Magnetic resonance imaging evidence for

676 presymptomatic change in thalamus and caudate in familial Alzheimer's  
677 disease. *Brain* 136, 1399–1414. doi:10.1093/brain/awt065

678 Schultz, A.P., Chhatwal, J.P., Hedden, T., Mormino, E.C., Hanseeuw, B.J.,  
679 Sepulcre, J., Huijbers, W., LaPoint, M., Buckley, R.F., Johnson, K.A.,  
680 Sperling, R.A., 2017. Phases of hyper and hypo connectivity in the  
681 Default Mode and Salience networks track with amyloid and Tau in  
682 clinically normal individuals. *J. Neurosci.* 37, 3263–16.  
683 doi:10.1523/JNEUROSCI.3263-16.2017

684 Sheline, Y.I., Morris, J.C., Snyder, A.Z., Price, J.L., Yan, Z., D'Angelo, G., Liu,  
685 C., Dixit, S., Benzinger, T., Fagan, A., Goate, A., Mintun, M.A., 2010.  
686 APOE4 Allele Disrupts Resting State fMRI Connectivity in the Absence of  
687 Amyloid Plaques or Decreased CSF A $\beta$ 42. *J. Neurosci.* 30, 17035–17040.  
688 doi:10.1523/JNEUROSCI.3987-10.2010

689 Shine, J.P., Hodgetts, C.J., Postans, M., Lawrence, A.D., Graham, K.S.,  
690 2015. APOE- $\epsilon$ 4 selectively modulates posteromedial cortex activity  
691 during scene perception and short-term memory in young healthy adults.  
692 *Sci. Rep.* 5, 16322. doi:10.1038/srep16322

693 Smith, S.M., Jenkinson, M., Johansen-Berg, H., Rueckert, D., Nichols, T.E.,  
694 Mackay, C.E., Watkins, K.E., Ciccarelli, O., Cader, M.Z., Matthews, P.M.,  
695 Behrens, T.E.J., 2006. Tract-based spatial statistics: Voxelwise analysis  
696 of multi-subject diffusion data. *Neuroimage* 31, 1487–1505.  
697 doi:10.1016/j.neuroimage.2006.02.024

698 Smith, S.M., Nichols, T.E., 2009. Threshold-free cluster enhancement:  
699 Addressing problems of smoothing, threshold dependence and  
700 localisation in cluster inference. *Neuroimage* 44, 83–98.

- 701           doi:10.1016/j.neuroimage.2008.03.061
- 702   Tuch, D.S., Reese, T.G., Wiegell, M.R., Makris, N., Belliveau, J.W., Van  
703           Wedeen, J., 2002. High angular resolution diffusion imaging reveals  
704           intravoxel white matter fiber heterogeneity. *Magn. Reson. Med.* 48, 577–  
705           582. doi:10.1002/mrm.10268
- 706   Ungar, L., Altmann, A., Greicius, M.D., 2014. Apolipoprotein E, gender, and  
707           Alzheimer's disease: An overlooked, but potent and promising interaction.  
708           *Brain Imaging Behav.* 8, 262–273. doi:10.1007/s11682-013-9272-x
- 709   Vettel, J.M., Cooper, N., Garcia, J.O., Yeh, F.-C., Verstynen, T.D., 2017.  
710           White Matter Tractography and Diffusion-Weighted Imaging. *eLS* 1–9.  
711           doi:10.1002/9780470015902.a0027162
- 712   Villain, N., Desgranges, B., Viader, F., de la Sayette, V., Mezenge, F.,  
713           Landeau, B., Baron, J.-C., Eustache, F., Chetelat, G., 2008.  
714           Relationships between Hippocampal Atrophy, White Matter Disruption,  
715           and Gray Matter Hypometabolism in Alzheimer's Disease. *J. Neurosci.*  
716           28, 6174–6181. doi:10.1523/JNEUROSCI.1392-08.2008
- 717   Wagenmakers, E.J., Marsman, M., Jamil, T., Ly, A., Verhagen, J., Love, J.,  
718           Selker, R., Gronau, Q.F., Šmíra, M., Epskamp, S., Matzke, D., Rouder,  
719           J.N., Morey, R.D., 2017. Bayesian inference for psychology. Part I:  
720           Theoretical advantages and practical ramifications. *Psychon. Bull. Rev.*  
721           1–23. doi:10.3758/s13423-017-1343-3
- 722   Westlye, E.T., Lundervold, A., Rootwelt, H., Lundervold, A.J., Westlye, L.T.,  
723           2011. Increased hippocampal default mode synchronization during rest in  
724           middle-aged and elderly APOE  $\epsilon$ 4 carriers: relationships with memory  
725           performance. *J. Neurosci.* 31, 7775–7783.

726           doi:10.1523/JNEUROSCI.1230-11.2011

727   Yamamoto, K., Tanei, Z. ichi, Hashimoto, T., Wakabayashi, T., Okuno, H.,

728           Naka, Y., Yizhar, O., Fenno, L.E., Fukayama, M., Bito, H., Cirrito, J.R.,

729           Holtzman, D.M., Deisseroth, K., Iwatsubo, T., 2015. Chronic optogenetic

730           activation augments A $\beta$  pathology in a mouse model of Alzheimer

731           disease. *Cell Rep.* 11, 859–865. doi:10.1016/j.celrep.2015.04.017

732   Yeatman, J.D., Dougherty, R.F., Ben-Shachar, M., Wandell, B.A., 2012.

733           Development of white matter and reading skills. *Proc. Natl. Acad. Sci.*

734           109, E3045–E3053. doi:10.1073/pnas.1206792109

735   Yeatman, J.D., Wandell, B.A., Mezer, A.A., 2014. Lifespan maturation and

736           degeneration of human brain white matter. *Nat. Commun.* 5, 4932.

737           doi:10.1038/ncomms5932

738

739

740

741

742

743

744

745

746

747

748

749

750

751 **Figures**

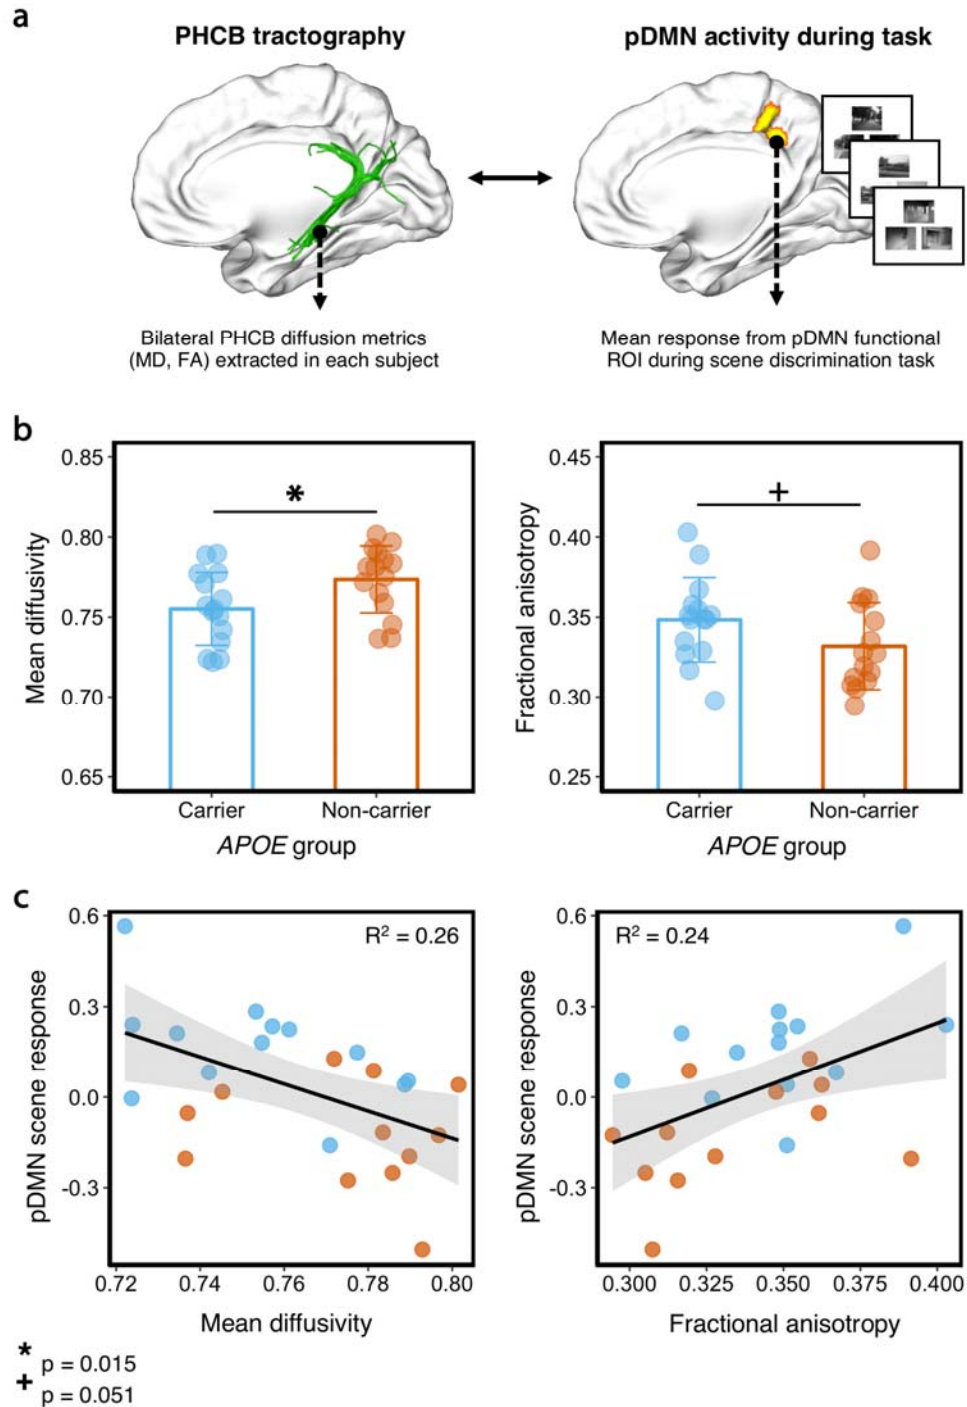

752

753

754

755

756 **Figure 1. Comparing parahippocampal cingulum bundle (PCHB) tissue**  
757 **microstructure between *APOE-ε4* carriers and non-carriers.** (a) Left:  
758 Deterministic tractography was conducted in each subject and free water  
759 corrected indices of bilateral PHCB microstructure (MD, FA) were extracted  
760 (left). Right: To examine associations with functional activity, these metrics  
761 were correlated with BOLD activity from an independently-defined posterior  
762 default mode network (pDMN) functional region-of-interest during a perceptual  
763 discrimination task (Shine et al., 2015). Example scene trials for the  
764 perceptual ‘odd-one-out’ discrimination task are shown. (b) Plots comparing  
765 mean bilateral PHCB MD and FA for *APOE-ε4* carriers and non-carriers.  
766 Individual data points are displayed jittered on each bar. (c) Scatter plots  
767 showing the association between scene (vs. “size” baseline) activity in pDMN  
768 and MD (left) and FA (right) in the PHCB. A total of 25 data points are shown  
769 on each scatter plot (13 carriers, blue markers; 12 non-carriers, orange  
770 markers; see Section 2.6).  
771  
772



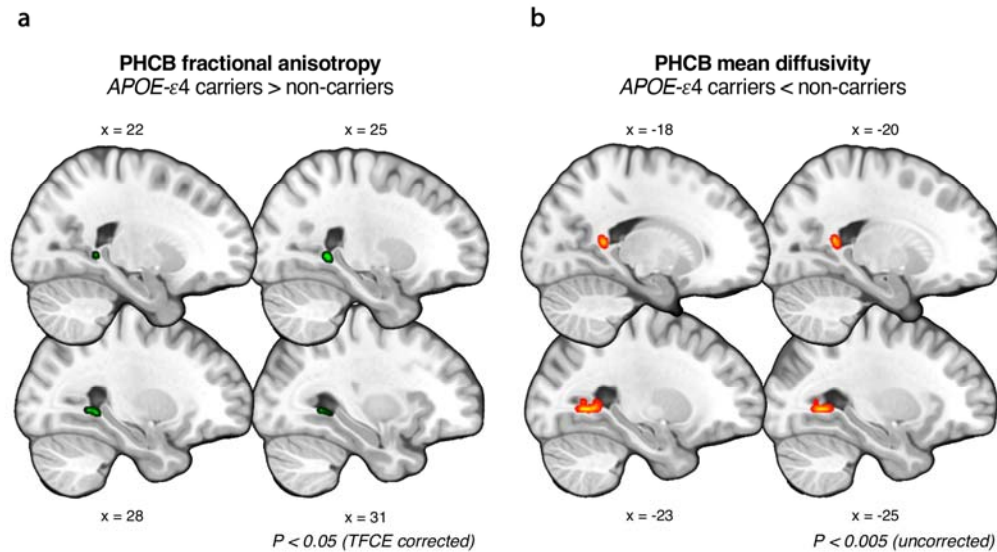

773

774 **Figure 2. Comparing parahippocampal cingulum bundle (PHCB)**  
775 **microstructure in *APOE-ε4* carriers and non-carriers using tract-based**  
776 **spatial statistics.** (a) A significant cluster (shown in green) was found  
777 showing greater FA in *APOE-ε4* carriers versus non-carriers in posterior  
778 PHCB ( $p < 0.05$ , TFCE-corrected). (b) A sub-threshold cluster (shown in red-  
779 yellow) reflecting lower MD in *APOE-ε4* carriers versus non-carriers was  
780 identified in posterior PHCB ( $p < 0.005$ , uncorrected). For visualization  
781 purposes, clusters have been 'thickened' using 'TBSS fill' in FSL. There were  
782 no voxel-wise differences for MD that survived stringent correction.

783

784

785

786

787

788

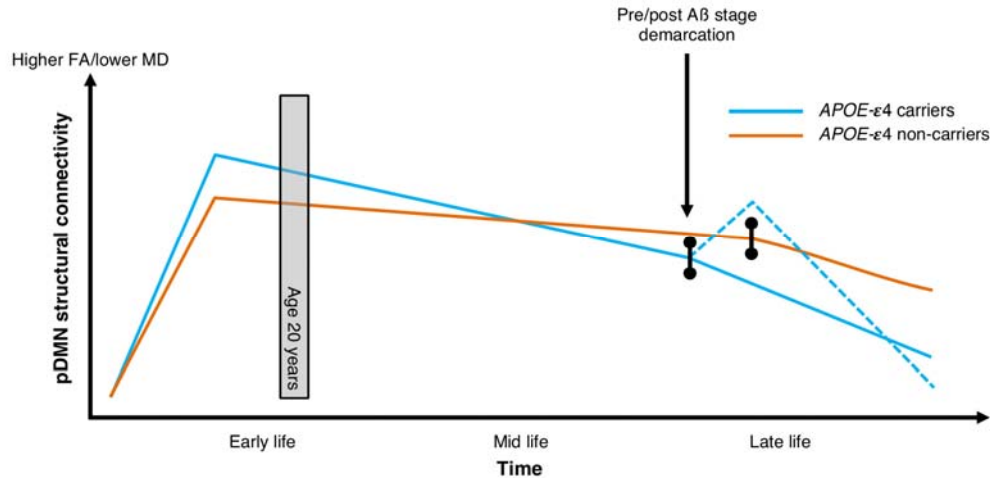

789

790 **Figure 3. Posterior DMN structural connectivity and amyloid deposition**

791 **across the lifetime.** Figure depicts hypothetical trajectories of pDMN

792 structural connectivity in *APOE-ε4* carriers and non-carriers (as can be

793 quantified using microstructural metrics derived from dMRI – i.e., FA and MD).

794 Increased structural connectivity in young adult *APOE-ε4* carriers (the age of

795 our sample indicated by a grey box at 20 years) - which emerges over

796 development – is proposed to lead to steeper decline across the lifespan

797 (Brown et al., 2011; Felsky, 2013). Variation in structural connectivity across

798 the lifespan leads to different demarcation points for amyloid-β aggregation,

799 with *APOE-ε4* carriers showing earlier accumulation. The dashed blue

800 indicates a hypothesized increase in connectivity in response to initial

801 amyloid-β burden – which may be mirrored in activity changes (Jagust and

802 Mormino, 2012). Amyloid-β deposition leads to “wear and tear” in the pDMN

803 and a steep later-life decline in network structural connectivity, and eventual

804 network failure (Jones et al., 2016).
